# Supplementary material
Source: PubMed Central journal article supplement (PMC1904137)

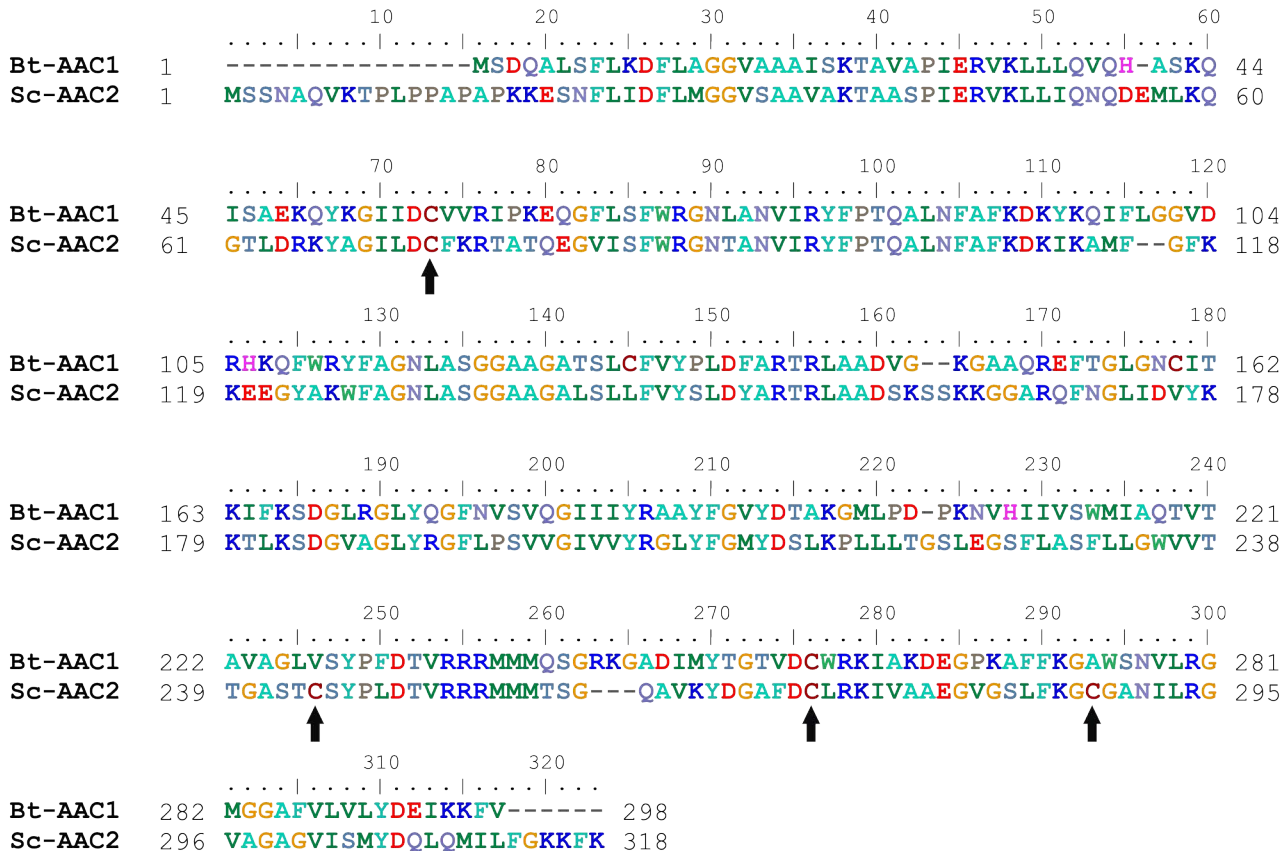

Supplement: pnas_0703969104_1.pdf [file pnas_0703969104_1.pdf]

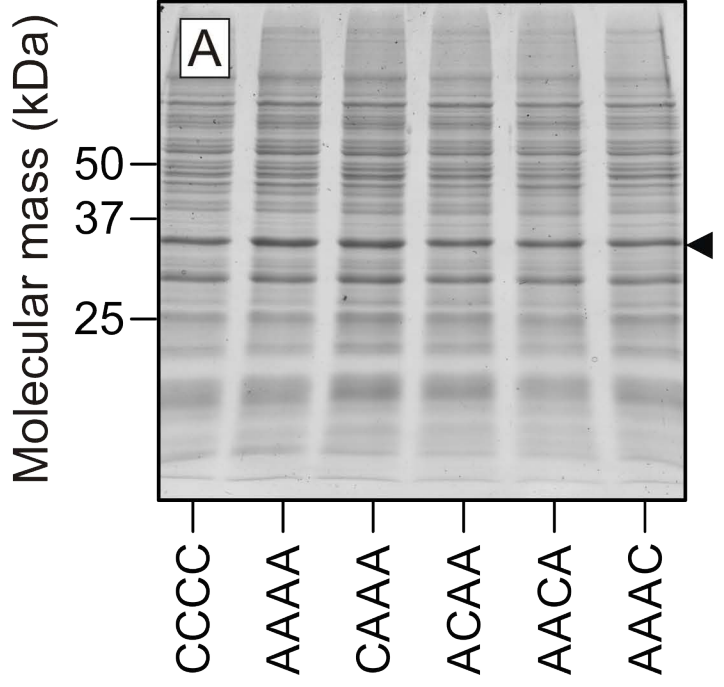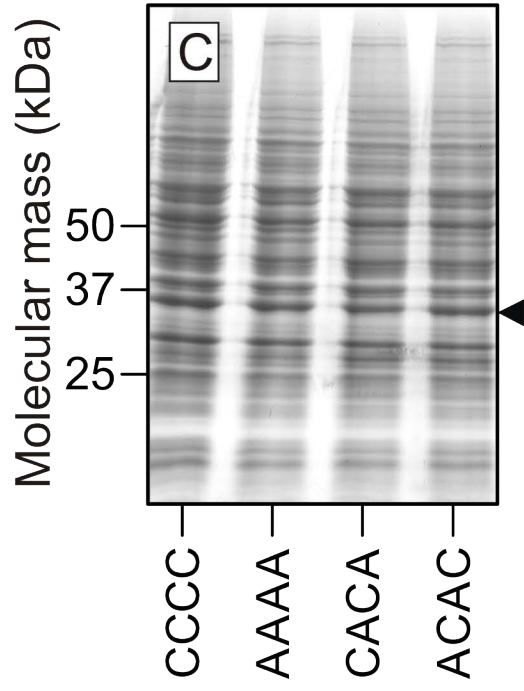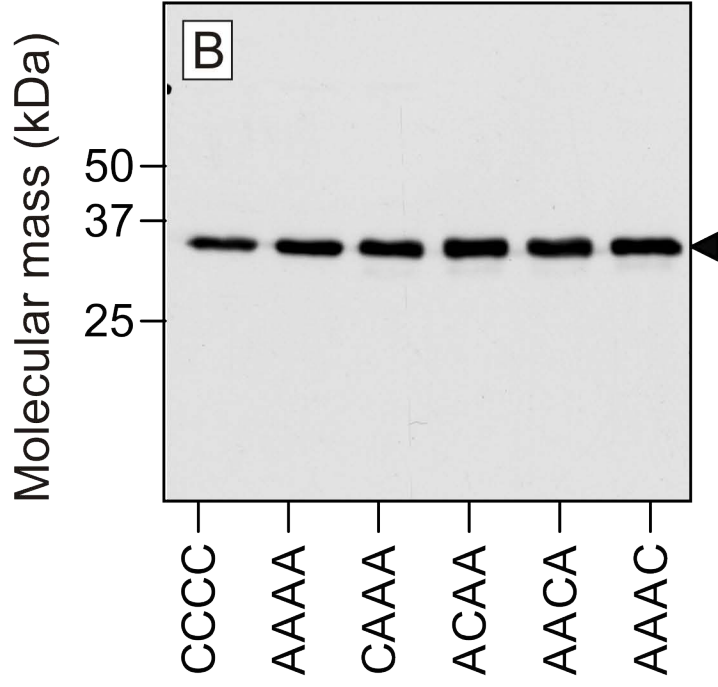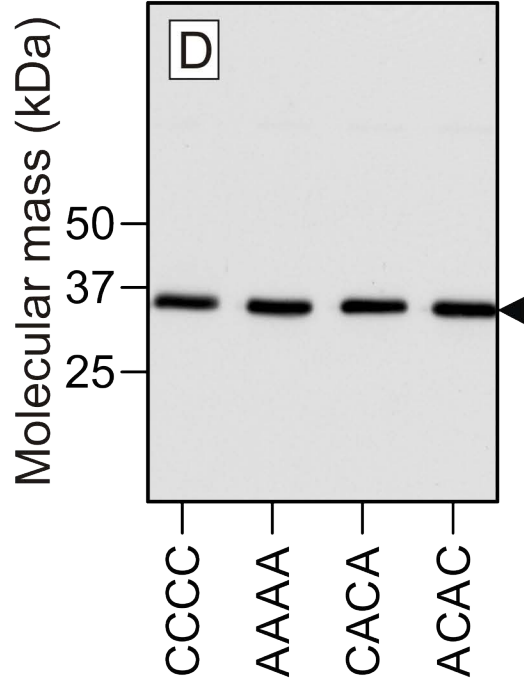

Supplement: pnas_0703969104_2.pdf [file pnas_0703969104_2.pdf]

**1 2 3 4**

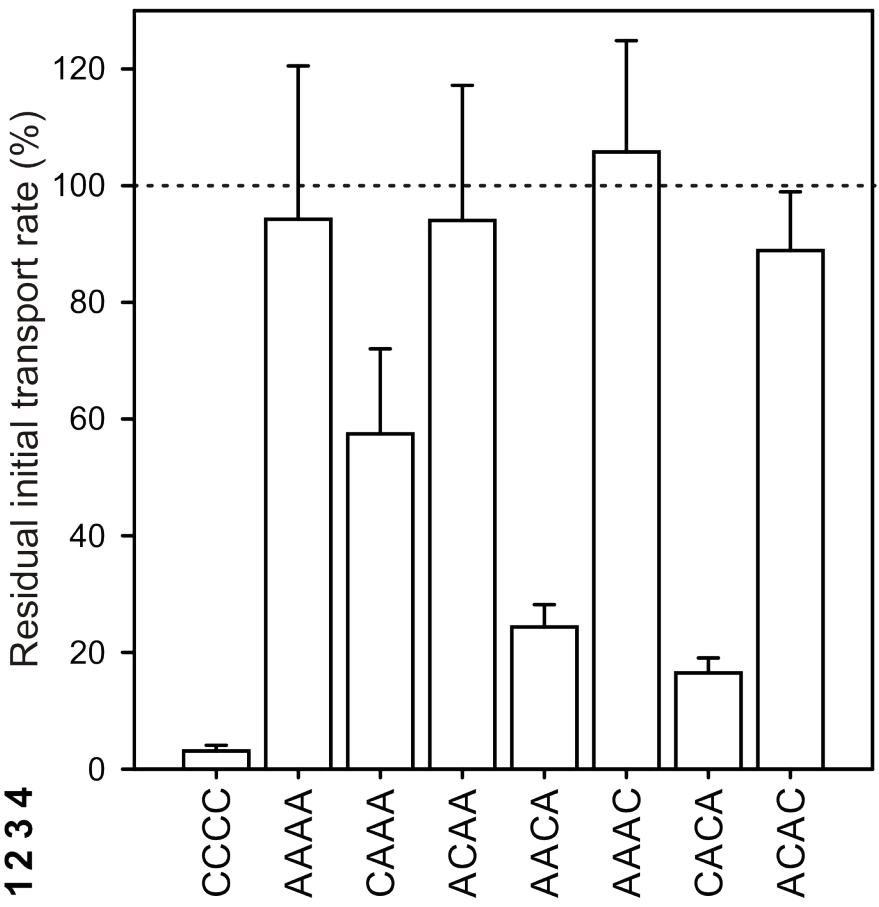

Supplement: pnas_0703969104_3.pdf [file pnas_0703969104_3.pdf]

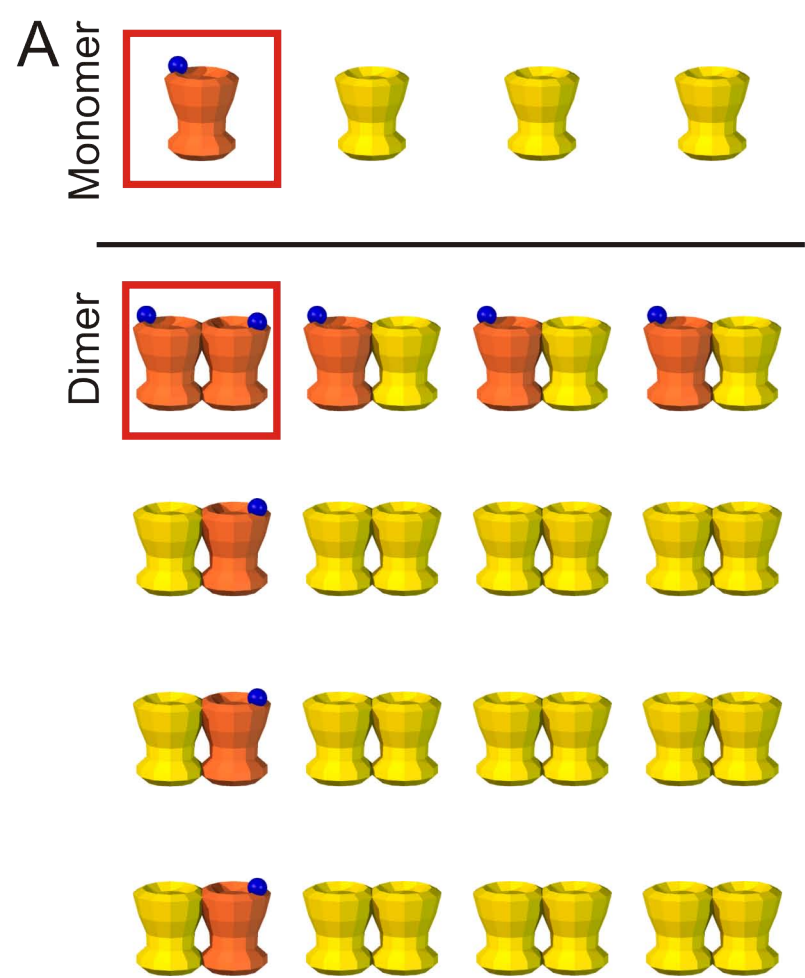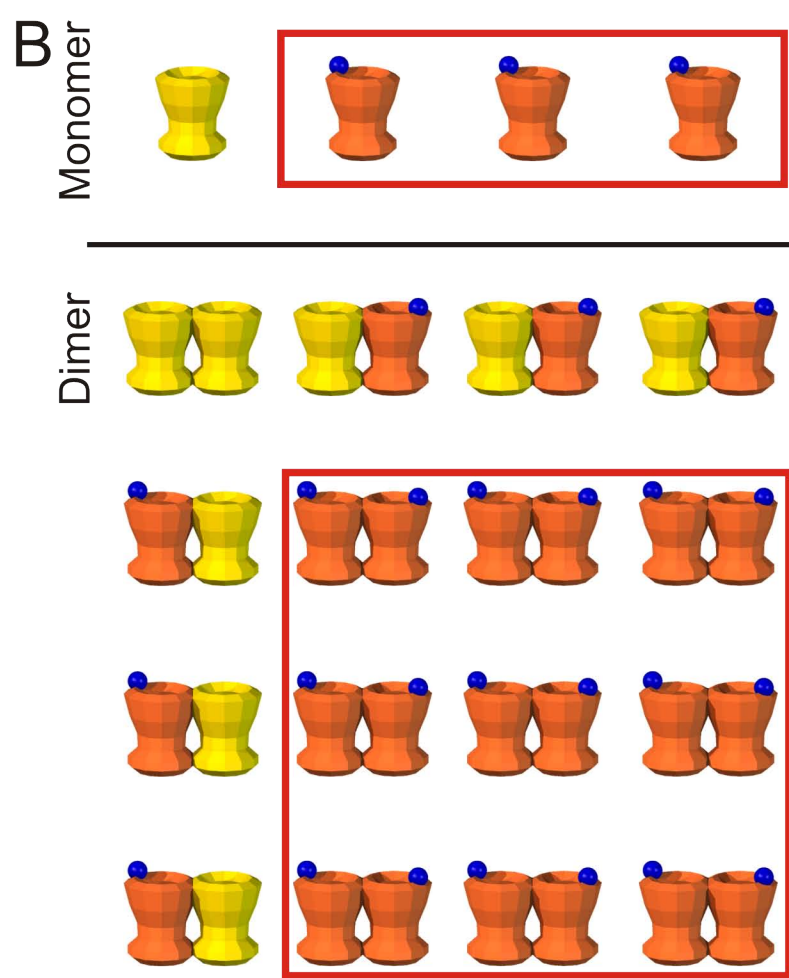

Supplement: pnas_0703969104_4.pdf [file pnas_0703969104_4.pdf]
